# Supplementary material for: Development of a prognostic model based on anoikis-related genes for predicting clinical prognosis and immunotherapy of hepatocellular carcinoma
Source: Aging (Albany NY). 2023 Oct 2;15(19):10253–71. doi: 10.18632/aging.205073 (PMC10599733; doi:10.18632/aging.205073)
Supplement: Supplementary Figure 1 [file aging-15-205073-s001.pdf]

## SUPPLEMENTARY FIGURE

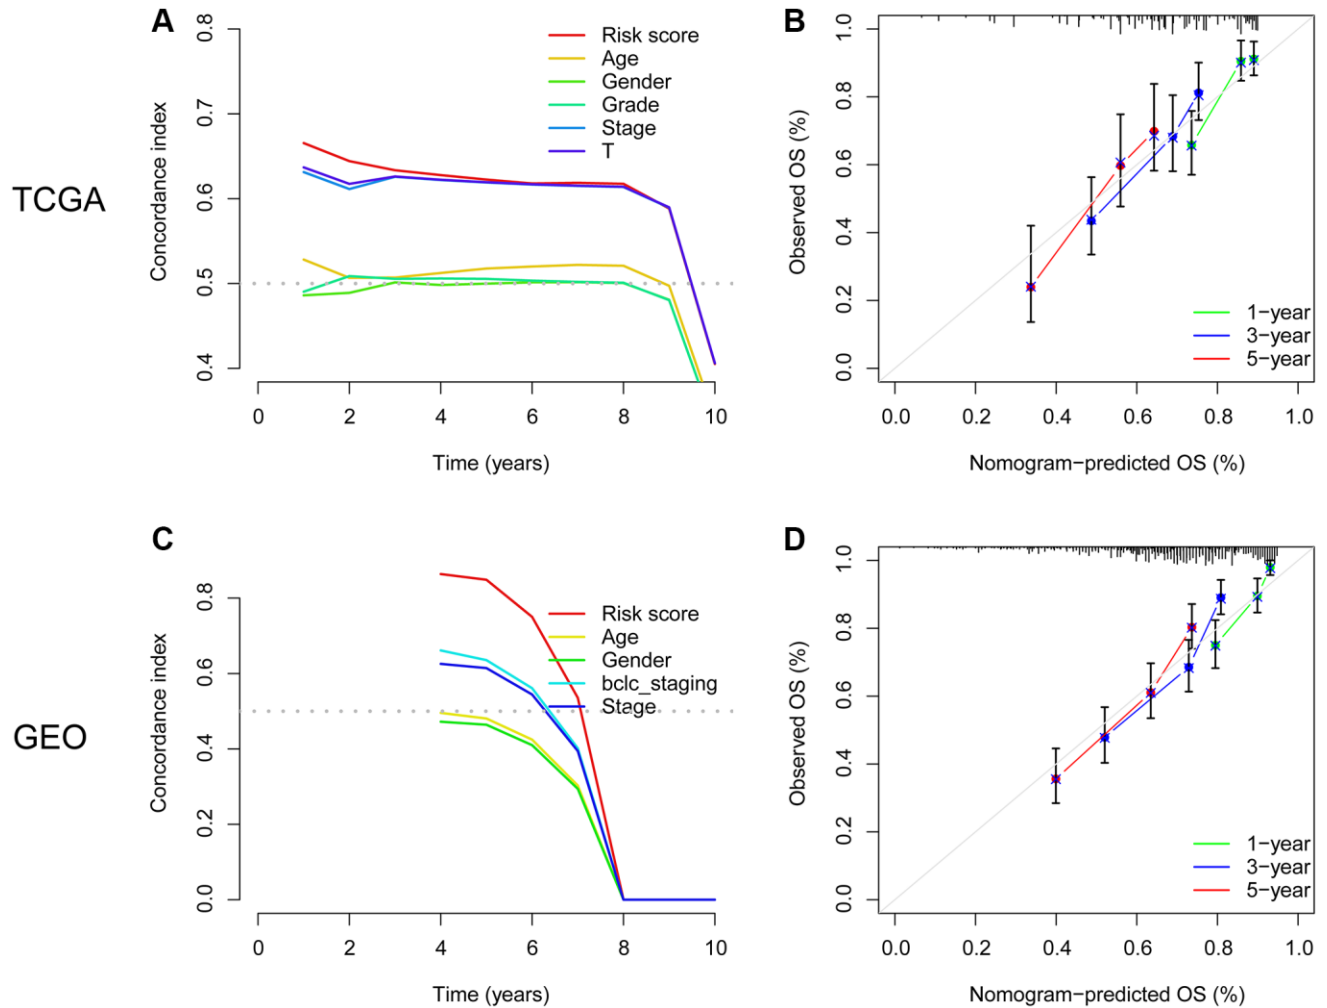

**Supplementary Figure 1. The C-index and calibration analysis in TCGA and GEO cohorts.** (A) Concordance index of TCGA database. (B) Calibration curve analysis of TCGA database. (C) Concordance index of GEO database. (D) Calibration curve analysis of GEO database.
