# Supplementary material for: Development of a prognostic model based on anoikis-related genes for predicting clinical prognosis and immunotherapy of hepatocellular carcinoma
Source: publisher site journal article supplement (doi:10.18632/aging.205073), 2023-10-02
Supplement: Supplementary file [file aging-v15i19-205073-supplementary-material-SD2.pdf]

## SUPPLEMENTARY TABLES

**Supplementary Table 1. The gene list of anoikis.**

---

| <b>Anoikis related genes</b> |  |
|------------------------------|--|
| CEACAM5                      |  |
| MYBBP1A                      |  |
| CHEK2                        |  |
| CRYBA1                       |  |
| SIK1                         |  |
| E2F1                         |  |
| AKT1                         |  |
| DAPK2                        |  |
| MTOR                         |  |
| BRMS1                        |  |
| ITGA5                        |  |
| ITGB1                        |  |
| MCL1                         |  |
| CEACAM6                      |  |
| NOTCH1                       |  |
| NTRK2                        |  |
| PTRH2                        |  |
| PDK4                         |  |
| PIK3CA                       |  |
| ZNF304                       |  |
| PTK2                         |  |
| BCL2                         |  |
| SNAI2                        |  |
| SRC                          |  |
| STK11                        |  |
| MAP3K7                       |  |
| TFDP1                        |  |
| TLE1                         |  |
| TSC2                         |  |
| ANKRD13C                     |  |
| IKBKG                        |  |
| CAV1                         |  |
| BMF                          |  |

---

**Supplementary Table 2. The gene-specific primer pairs.**

---

|       |                        |
|-------|------------------------|
| PDK4  |                        |
| F     | AGAGGTGGAGCATTCTCGC    |
| R     | ATGTTGGCGAGTCTCACAGG   |
| STK11 |                        |
| F     | CACTCAGGACTTCACGGTGC   |
| R     | CTCTGTGCCGTTTCATACACAC |

---
